# Supplementary material for: Bacteriophage DNA induces an interrupted immune response during phage therapy in a chicken model
Source: PubMed Central journal article supplement (PMC10937645; doi:10.1038/s41467-024-46555-7), 2024-03-13

## Reporting Summary

Nature Portfolio wishes to improve the reproducibility of the work that we publish. This form provides structure for consistency and transparency in reporting. For further information on Nature Portfolio policies, see our [Editorial Policies](#) and the [Editorial Policy Checklist](#).

Please do not complete any field with "not applicable" or n/a. Refer to the help text for what text to use if an item is not relevant to your study. For final submission: please carefully check your responses for accuracy; you will not be able to make changes later.

### Statistics

For all statistical analyses, confirm that the following items are present in the figure legend, table legend, main text, or Methods section.

- | n/a                                 | Confirmed                                                                                                                                                                                                                                                                                      |
|-------------------------------------|------------------------------------------------------------------------------------------------------------------------------------------------------------------------------------------------------------------------------------------------------------------------------------------------|
| <input type="checkbox"/>            | <input checked="" type="checkbox"/> The exact sample size ( $n$ ) for each experimental group/condition, given as a discrete number and unit of measurement                                                                                                                                    |
| <input type="checkbox"/>            | <input checked="" type="checkbox"/> A statement on whether measurements were taken from distinct samples or whether the same sample was measured repeatedly                                                                                                                                    |
| <input type="checkbox"/>            | <input checked="" type="checkbox"/> The statistical test(s) used AND whether they are one- or two-sided<br><i>Only common tests should be described solely by name; describe more complex techniques in the Methods section.</i>                                                               |
| <input type="checkbox"/>            | <input checked="" type="checkbox"/> A description of all covariates tested                                                                                                                                                                                                                     |
| <input type="checkbox"/>            | <input checked="" type="checkbox"/> A description of any assumptions or corrections, such as tests of normality and adjustment for multiple comparisons                                                                                                                                        |
| <input type="checkbox"/>            | <input checked="" type="checkbox"/> A full description of the statistical parameters including central tendency (e.g. means) or other basic estimates (e.g. regression coefficient) AND variation (e.g. standard deviation) or associated estimates of uncertainty (e.g. confidence intervals) |
| <input type="checkbox"/>            | <input checked="" type="checkbox"/> For null hypothesis testing, the test statistic (e.g. $F$ , $t$ , $r$ ) with confidence intervals, effect sizes, degrees of freedom and $P$ value noted<br><i>Give <math>P</math> values as exact values whenever suitable.</i>                            |
| <input checked="" type="checkbox"/> | <input type="checkbox"/> For Bayesian analysis, information on the choice of priors and Markov chain Monte Carlo settings                                                                                                                                                                      |
| <input checked="" type="checkbox"/> | <input type="checkbox"/> For hierarchical and complex designs, identification of the appropriate level for tests and full reporting of outcomes                                                                                                                                                |
| <input checked="" type="checkbox"/> | <input type="checkbox"/> Estimates of effect sizes (e.g. Cohen's $d$ , Pearson's $r$ ), indicating how they were calculated                                                                                                                                                                    |

*Our web collection on [statistics for biologists](#) contains articles on many of the points above.*

### Software and code

Policy information about [availability of computer code](#)

Data collection

**Skant Software 6.1.1.7; LAS X Life Science Microscope Software Lite 4.0; EnSpire; Primer-BLAST**

Data analysis

**GraphPad Prism 8.2.1; Skant Software 6.1.1.7; SPSS 21.0; LAS X Life Science Microscope Software Lite 4.0; EnSpire; BioRender**

For manuscripts utilizing custom algorithms or software that are central to the research but not yet described in published literature, software must be made available to editors and reviewers. We strongly encourage code deposition in a community repository (e.g. GitHub). See the Nature Portfolio [guidelines for submitting code & software](#) for further information.

### Data

Policy information about [availability of data](#)

All manuscripts must include a [data availability statement](#). This statement should provide the following information, where applicable:

- Accession codes, unique identifiers, or web links for publicly available datasets
- A description of any restrictions on data availability
- For clinical datasets or third party data, please ensure that the statement adheres to our [policy](#)

**Raw data are available in the Data Source file, associated to this paper**

## Research involving human participants, their data, or biological material

Policy information about studies with [human participants or human data](#). See also policy information about [sex, gender \(identity/presentation\), and sexual orientation](#) and [race, ethnicity and racism](#).

|                                                                    |                |
|--------------------------------------------------------------------|----------------|
| Reporting on sex and gender                                        | Not applicable |
| Reporting on race, ethnicity, or other socially relevant groupings | Not applicable |
| Population characteristics                                         | Not applicable |
| Recruitment                                                        | Not applicable |
| Ethics oversight                                                   | Not applicable |

Note that full information on the approval of the study protocol must also be provided in the manuscript.

## Field-specific reporting

Please select the one below that is the best fit for your research. If you are not sure, read the appropriate sections before making your selection.

Life sciences  Behavioural & social sciences  Ecological, evolutionary & environmental sciences

For a reference copy of the document with all sections, see [nature.com/documents/nr-reporting-summary-flat.pdf](https://www.nature.com/documents/nr-reporting-summary-flat.pdf)

## Life sciences study design

All studies must disclose on these points even when the disclosure is negative.

|                 |                                                                                                                                  |
|-----------------|----------------------------------------------------------------------------------------------------------------------------------|
| Sample size     | Chickens, n=100, divided into 4 groups, 25 animals each (determined by Power Analysis)                                           |
| Data exclusions | No data were excluded (all obtained results were appropriate for analyses)                                                       |
| Replication     | In laboratory experiments, at least 3 biological repeats (independent experiments) were conducted.                               |
| Randomization   | Animals in the group were of the same age, and they were randomly ascribed to each experimental group                            |
| Blinding        | Different persons collected the samples, coded them, and provided for analysis by other persons. Then, the results were de-coded |

## Behavioural & social sciences study design

All studies must disclose on these points even when the disclosure is negative.

|                   |                |
|-------------------|----------------|
| Study description | Not applicable |
| Research sample   | Not applicable |
| Sampling strategy | Not applicable |
| Data collection   | Not applicable |
| Timing            | Not applicable |
| Data exclusions   | Not applicable |
| Non-participation | Not applicable |
| Randomization     | Not applicable |

# Ecological, evolutionary & environmental sciences study design

All studies must disclose on these points even when the disclosure is negative.

|                          |                                             |
|--------------------------|---------------------------------------------|
| Study description        | <input type="text" value="Not applicable"/> |
| Research sample          | <input type="text" value="Not applicable"/> |
| Sampling strategy        | <input type="text" value="Not applicable"/> |
| Data collection          | <input type="text" value="Not applicable"/> |
| Timing and spatial scale | <input type="text" value="Not applicable"/> |
| Data exclusions          | <input type="text" value="Not applicable"/> |
| Reproducibility          | <input type="text" value="Not applicable"/> |
| Randomization            | <input type="text" value="Not applicable"/> |
| Blinding                 | <input type="text" value="Not applicable"/> |

Did the study involve field work?  Yes  No

## Field work, collection and transport

|                        |                                             |
|------------------------|---------------------------------------------|
| Field conditions       | <input type="text" value="Not applicable"/> |
| Location               | <input type="text" value="Not applicable"/> |
| Access & import/export | <input type="text" value="Not applicable"/> |
| Disturbance            | <input type="text" value="Not applicable"/> |

## Reporting for specific materials, systems and methods

We require information from authors about some types of materials, experimental systems and methods used in many studies. Here, indicate whether each material, system or method listed is relevant to your study. If you are not sure if a list item applies to your research, read the appropriate section before selecting a response.

### Materials & experimental systems

| n/a                                 | Included in the study                                           |
|-------------------------------------|-----------------------------------------------------------------|
| <input type="checkbox"/>            | <input checked="" type="checkbox"/> Antibodies                  |
| <input type="checkbox"/>            | <input checked="" type="checkbox"/> Eukaryotic cell lines       |
| <input checked="" type="checkbox"/> | <input type="checkbox"/> Palaeontology and archaeology          |
| <input type="checkbox"/>            | <input checked="" type="checkbox"/> Animals and other organisms |
| <input checked="" type="checkbox"/> | <input type="checkbox"/> Clinical data                          |
| <input checked="" type="checkbox"/> | <input type="checkbox"/> Dual use research of concern           |
| <input checked="" type="checkbox"/> | <input type="checkbox"/> Plants                                 |

### Methods

| n/a                                 | Included in the study                           |
|-------------------------------------|-------------------------------------------------|
| <input checked="" type="checkbox"/> | <input type="checkbox"/> ChIP-seq               |
| <input checked="" type="checkbox"/> | <input type="checkbox"/> Flow cytometry         |
| <input checked="" type="checkbox"/> | <input type="checkbox"/> MRI-based neuroimaging |

## Antibodies

Antibodies used

Certificate of quality from Shanghai Coon koon Biotech Co. Ltd. is attached. Validation by calibration curves with the target antigen is also attached. For ELISA, the commercial reagent kits were used (Shanghai Coon Koon Biotech Co., Ltd., Shanghai, China; Wuhan Xinqidi Biological Technology Co., Ltd, Wuhan, China; Enlibio, Wuhan, China; Cell Signaling Technology, Massachusetts, USA; Elabscience, Texas, USA; and MyBiosource, San Diego, USA). For determination of levels of TLR4 (#EIA06452Ch), IFN $\beta$  (#CK-bio-27460), TNF $\alpha$  (#CK-bio-18240), TBKBP1 (#CK-bio-22537), cGAS (#CK-bio-27451), IKK $\epsilon$  (CK-bio-22816), IFI16 (#CK-bio-22673), IRF3 (#CK-bio-22057), phospho-IRF3 (Ser 396) (#CK-bio-29556), phospho-IRF7 (Ser 477) (#CK-bio-22459), and TANK (#CK-bio-25271), a 1:1 dilution was used. For determination of levels of IRAK1 (#CK-bio-27453), IRAK4 (#CK-bio-27452), MyD88 (#CK-bio-27461), DDX41 (#CK-bio-22537), IRF7 (#CK-bio-26639), NAP1 (#CK-bio-26749), cGMP (#CK-bio-24454), IFN $\alpha$  (#CK-bio-18168), NF- $\kappa$ B (#CK-bio-22695), phospho- NF- $\kappa$ B (S932) (#CK-bio-29204), phospho-TBK1 (Ser172) (#CK-bio-29739), TBK1 (#CK-bio-28646), TLR9 (#CK-bio-23737), TMEM 173/STING (#CK-bio-23792), TLR6 (#CK-bio-23254), TLR3 (#CK-bio-23730), and TRAF6 (#CK-bio-26795), samples were not diluted. For dsRNA, anti-dsRNA clone rJ2 antibody (Sigma-Aldrich, #MABE1134) at the 1:100 dilution, and secondary Goat Anti-Mouse IgG (H+L), Highly Cross-Adsorbed antibody (Biotium, #20231-1) (1:500 ratio)

## Eukaryotic cell lines

Policy information about [cell lines and Sex and Gender in Research](#)

|                                                                      |                                                                                                                                                 |
|----------------------------------------------------------------------|-------------------------------------------------------------------------------------------------------------------------------------------------|
| Cell line source(s)                                                  | The DT40 line of chicken lymphoblasts was purchased from American Type Culture Collection (AT CC)                                               |
| Authentication                                                       | ATTCC guarantees the authenticity of the cell line; cells were checked for morphology and Western-blotting profile for TLR2.1, TLR2.2 and TLR4. |
| Mycoplasma contamination                                             | We confirm that the cell line was tested negatively for mycoplasma contamination                                                                |
| Commonly misidentified lines<br>(See <a href="#">ICLAC</a> register) | We confirm that no commonly misidentified cell line was used in the study                                                                       |

## Palaeontology and Archaeology

|                                                                                                                                                 |                |
|-------------------------------------------------------------------------------------------------------------------------------------------------|----------------|
| Specimen provenance                                                                                                                             | Not applicable |
| Specimen deposition                                                                                                                             | Not applicable |
| Dating methods                                                                                                                                  | Not applicable |
| <input type="checkbox"/> Tick this box to confirm that the raw and calibrated dates are available in the paper or in Supplementary Information. |                |
| Ethics oversight                                                                                                                                | Not applicable |

Note that full information on the approval of the study protocol must also be provided in the manuscript.

## Animals and other research organisms

Policy information about [studies involving animals; ARRIVE guidelines](#) recommended for reporting animal research, and [Sex and Gender in Research](#)

|                         |                                                                                                                                                                                                                                                                        |
|-------------------------|------------------------------------------------------------------------------------------------------------------------------------------------------------------------------------------------------------------------------------------------------------------------|
| Laboratory animals      | Chickens ( <i>Gallus gallus domesticus</i> ), wild-type, age of 7 days, delivered by the breeder (registration no. PL28036602).<br>Mice ( <i>Mus musculus</i> ), line C57BL/6J, age of 9 months, purchased from the Tri-City Central Animal Laboratory, Gdansk, Poland |
| Wild animals            | The study did not involve wild animals.                                                                                                                                                                                                                                |
| Reporting on sex        | Both males and females were used in experiments. No differences in results related to sex were noted.                                                                                                                                                                  |
| Field-collected samples | The study did not involve samples collected in the field                                                                                                                                                                                                               |
| Ethics oversight        | Local Ethical Committee for Experimental Animals in Olsztyn, Poland (permission no. 62/2019);<br>Local Ethics Committee for Experimental Animals in Bydgoszcz (Poland) (permission no. 02/2022).                                                                       |

Note that full information on the approval of the study protocol must also be provided in the manuscript.

## Clinical data

Policy information about [clinical studies](#)

All manuscripts should comply with the ICMJE [guidelines for publication of clinical research](#) and a completed [CONSORT checklist](#) must be included with all submissions.

|                             |                |
|-----------------------------|----------------|
| Clinical trial registration | Not applicable |
| Study protocol              | Not applicable |
| Data collection             | Not applicable |
| Outcomes                    | Not applicable |

## Dual use research of concern

Policy information about [dual use research of concern](#)

### Hazards

Could the accidental, deliberate or reckless misuse of agents or technologies generated in the work, or the application of information presented in the manuscript, pose a threat to:

- | No                                  | Yes                                                 |
|-------------------------------------|-----------------------------------------------------|
| <input checked="" type="checkbox"/> | <input type="checkbox"/> Public health              |
| <input checked="" type="checkbox"/> | <input type="checkbox"/> National security          |
| <input checked="" type="checkbox"/> | <input type="checkbox"/> Crops and/or livestock     |
| <input checked="" type="checkbox"/> | <input type="checkbox"/> Ecosystems                 |
| <input checked="" type="checkbox"/> | <input type="checkbox"/> Any other significant area |

## Experiments of concern

Does the work involve any of these experiments of concern:

- | No                                  | Yes                                                                                                  |
|-------------------------------------|------------------------------------------------------------------------------------------------------|
| <input checked="" type="checkbox"/> | <input type="checkbox"/> Demonstrate how to render a vaccine ineffective                             |
| <input checked="" type="checkbox"/> | <input type="checkbox"/> Confer resistance to therapeutically useful antibiotics or antiviral agents |
| <input checked="" type="checkbox"/> | <input type="checkbox"/> Enhance the virulence of a pathogen or render a nonpathogen virulent        |
| <input checked="" type="checkbox"/> | <input type="checkbox"/> Increase transmissibility of a pathogen                                     |
| <input checked="" type="checkbox"/> | <input type="checkbox"/> Alter the host range of a pathogen                                          |
| <input checked="" type="checkbox"/> | <input type="checkbox"/> Enable evasion of diagnostic/detection modalities                           |
| <input checked="" type="checkbox"/> | <input type="checkbox"/> Enable the weaponization of a biological agent or toxin                     |
| <input checked="" type="checkbox"/> | <input type="checkbox"/> Any other potentially harmful combination of experiments and agents         |

## Plants

- |                       |                |
|-----------------------|----------------|
| Seed stocks           | Not applicable |
| Novel plant genotypes | Not applicable |
| Authentication        | Not applicable |

## ChIP-seq

### Data deposition

- Confirm that both raw and final processed data have been deposited in a public database such as [GEO](#).
- Confirm that you have deposited or provided access to graph files (e.g. BED files) for the called peaks.

- |                                                                    |                |
|--------------------------------------------------------------------|----------------|
| Data access links<br><i>May remain private before publication.</i> | Not applicable |
| Files in database submission                                       | Not applicable |
| Genome browser session<br>(e.g. <a href="#">UCSC</a> )             | Not applicable |

### Methodology

- |                         |                |
|-------------------------|----------------|
| Replicates              | Not applicable |
| Sequencing depth        | Not applicable |
| Antibodies              | Not applicable |
| Peak calling parameters | Not applicable |
| Data quality            | Not applicable |

## Flow Cytometry

### Plots

Confirm that:

- The axis labels state the marker and fluorochrome used (e.g. CD4-FITC).
- The axis scales are clearly visible. Include numbers along axes only for bottom left plot of group (a 'group' is an analysis of identical markers).
- All plots are contour plots with outliers or pseudocolor plots.
- A numerical value for number of cells or percentage (with statistics) is provided.

### Methodology

Sample preparation

Not applicable

Instrument

Not applicable

Software

Not applicable

Cell population abundance

Not applicable

Gating strategy

Not applicable

- Tick this box to confirm that a figure exemplifying the gating strategy is provided in the Supplementary Information.

## Magnetic resonance imaging

### Experimental design

Design type

Not applicable

Design specifications

Not applicable

Behavioral performance measures

Not applicable

Imaging type(s)

Not applicable

Field strength

Not applicable

Sequence & imaging parameters

Not applicable

Area of acquisition

Not applicable

Diffusion MRI

Used

Not used

### Preprocessing

Preprocessing software

Not applicable

Normalization

Not applicable

Normalization template

Not applicable

Noise and artifact removal

Not applicable

Volume censoring

Not applicable

### Statistical modeling & inference

Model type and settings

Not applicable

Effect(s) tested

Not applicable

Specify type of analysis:  Whole brain  ROI-based  Both

Statistic type for inference

Not applicable

(See [Eklund et al. 2016](#))

Correction

Not applicable

## Models & analysis

n/a | Involved in the study

Functional and/or effective connectivity

Graph analysis

Multivariate modeling or predictive analysis

Functional and/or effective connectivity

Not applicable

Graph analysis

Not applicable

Multivariate modeling and predictive analysis

Not applicable

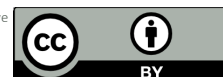

Supplement: 41467_2024_46555_MOESM3_ESM.pdf [file 41467_2024_46555_MOESM3_ESM.pdf]
